# Supplementary material
Source: HighWire-hosted journal article supplement (https://bmjopenquality.bmj.com/content/12/2/e002121)
Supplement: inline-supplementary-material-3 [file inline-supplementary-material-3.pdf]

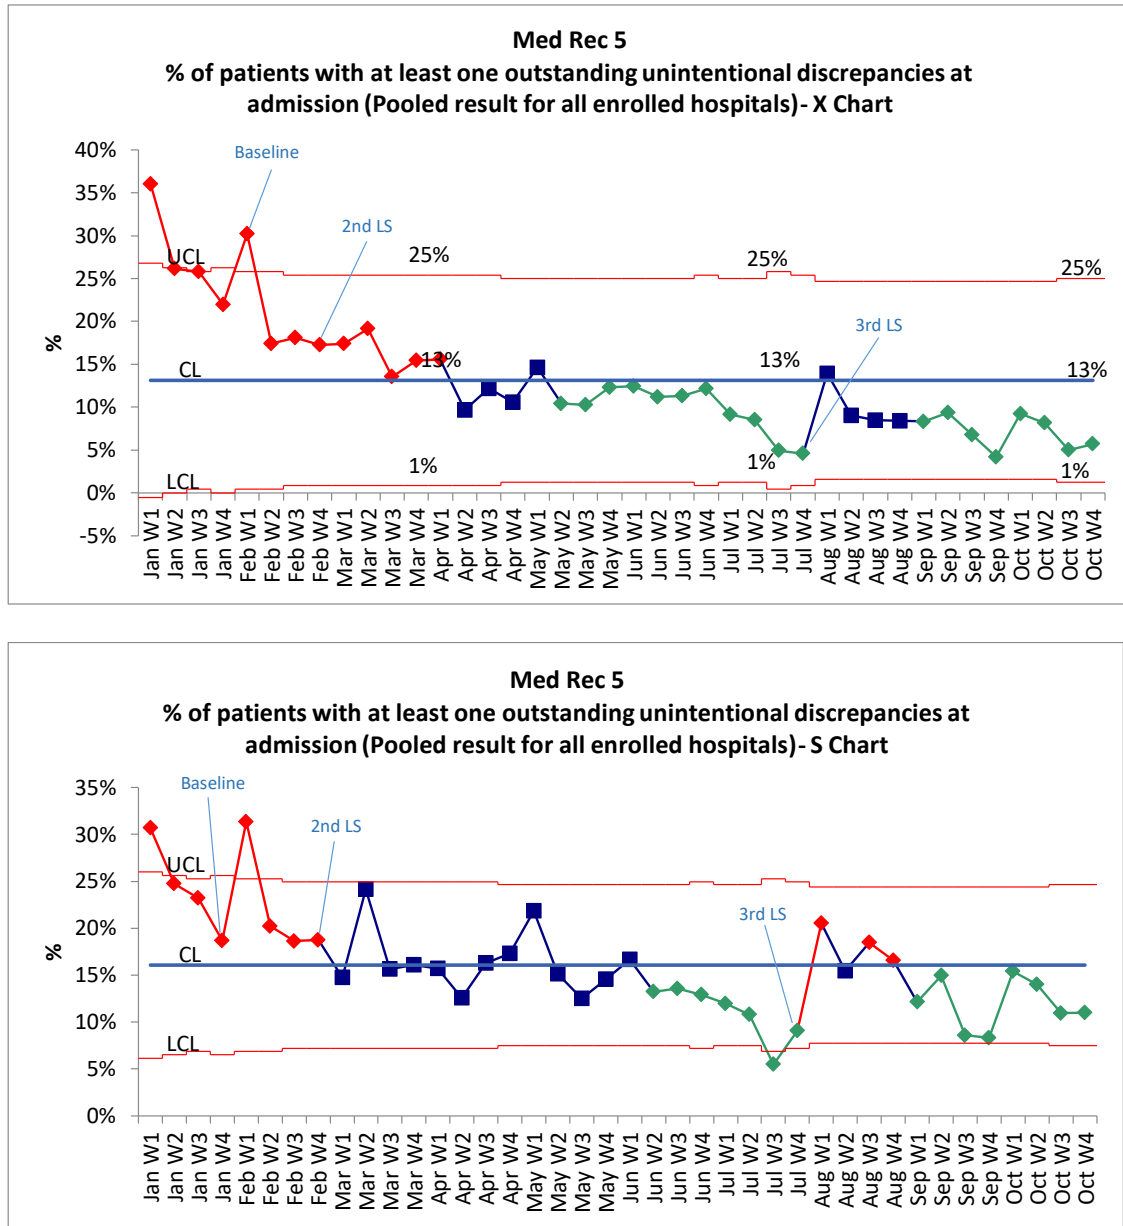

**Figure 1:** Control chart for percentage of patients at least one outstanding unintentional discrepancies at admission (pooled result for all enrolled hospitals).
